# Supplementary material for: Evidence That Schizophrenia Risk Variation in the ZNF804A Gene Exerts Its Effects During Fetal Brain Development
Source: Atypon-hosted journal article supplement (doi:10.1176/appi.ajp.2012.11121845), 2012-12-01

### Supplementary Table 1

**P-values from comparison of *ZNF804A* rs1344706 – rs12476147 haplotype counts between assayed brain cohorts and population samples from the International HapMap Project.** Predicted counts for the 4 potential haplotypes were compared between populations using Fisher’s exact tests. CEU = CEPH (Utah residents with ancestry from northern and western Europe); YRI = Yoruba in Ibadan, Nigeria; CHB = Han Chinese in Beijing, China.

|                            | <b>2nd trimester fetal</b> | <b>Adult</b> | <b>CEU</b> | <b>YRI</b> | <b>CHB</b> |
|----------------------------|----------------------------|--------------|------------|------------|------------|
| <b>1st trimester fetal</b> | 0.2456                     | 0.6636       | 0.1729     | 0.0021     | 0.0583     |
| <b>2nd trimester fetal</b> |                            | 0.7366       | 0.5489     | < 0.0001   | 0.3256     |
| <b>Adult</b>               |                            |              | 0.6911     | < 0.0001   | 0.2123     |

## Supplementary Figure 1

Expression of *ZNF804A* in 6 human brain regions ranging from 6 post-conception weeks to 82 years of age. Data were generated by the Department of Neurobiology, Yale University School of Medicine, using Affymetrix GeneChip Human Exon 1.0 ST Arrays and accessed by the authors via their publicly available database at <http://hbatlas.org>. NCX = neocortex; HIP = hippocampus; Amy = amygdala; STR = striatum; MD = mediodorsal nucleus of the thalamus; CBC = cerebellar cortex.

### References:

Johnson MB, et al. Neuron 2009; 62: 494-509.

Kang HJ, et al Nature 2011; 478:483-489.

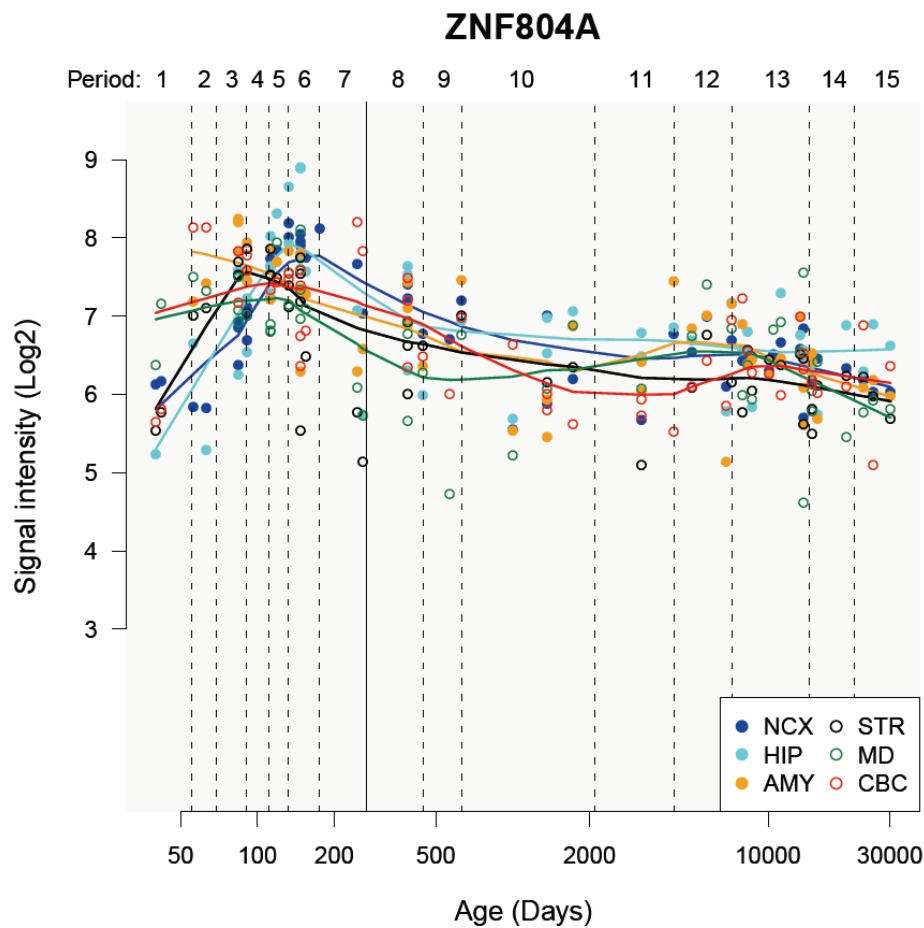

## Supplementary Figure 2

Expression of *ZNF804A* in prefrontal cortex samples ranging from 14 post-conception weeks to 80 years of age. Data were generated by the National Institute of Mental Health / Lieber Institute for Brain Development using spotted microarrays and accessed by the authors via the publicly available database: <http://braincloud.jhmi.edu>.

Reference:

Colantuoni C, et al. Nature. 2011. 478:519-523.

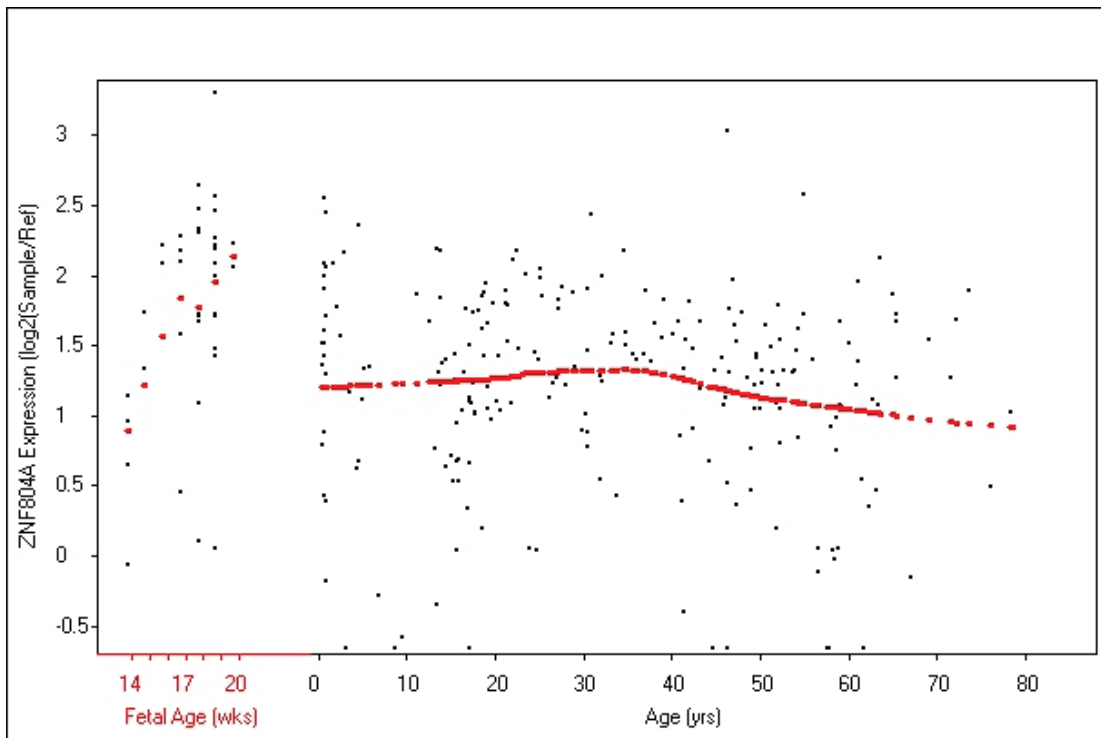

Supplement: 1301_ds001.pdf [file 1301_ds001.pdf]
